# Supplementary material for: Proteomic profiling of senescent human diploid fibroblasts treated with gamma-tocotrienol
Source: Springer Nature journal article supplement (doi:10.1186/s12906-018-2383-6), 2018-11-29
Supplement: MOESM2 [file 16304758]

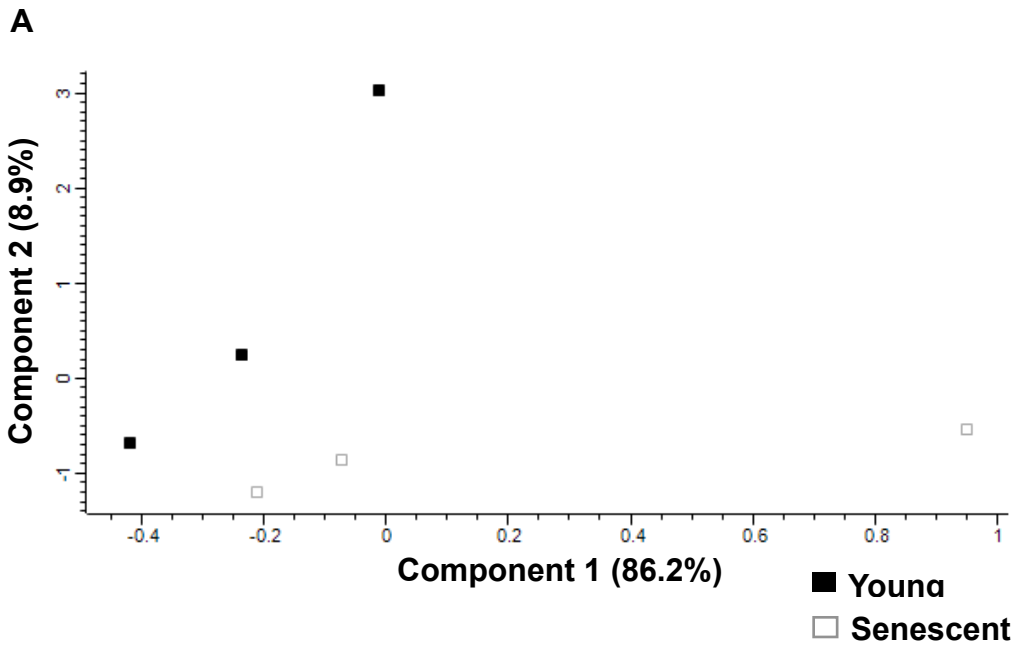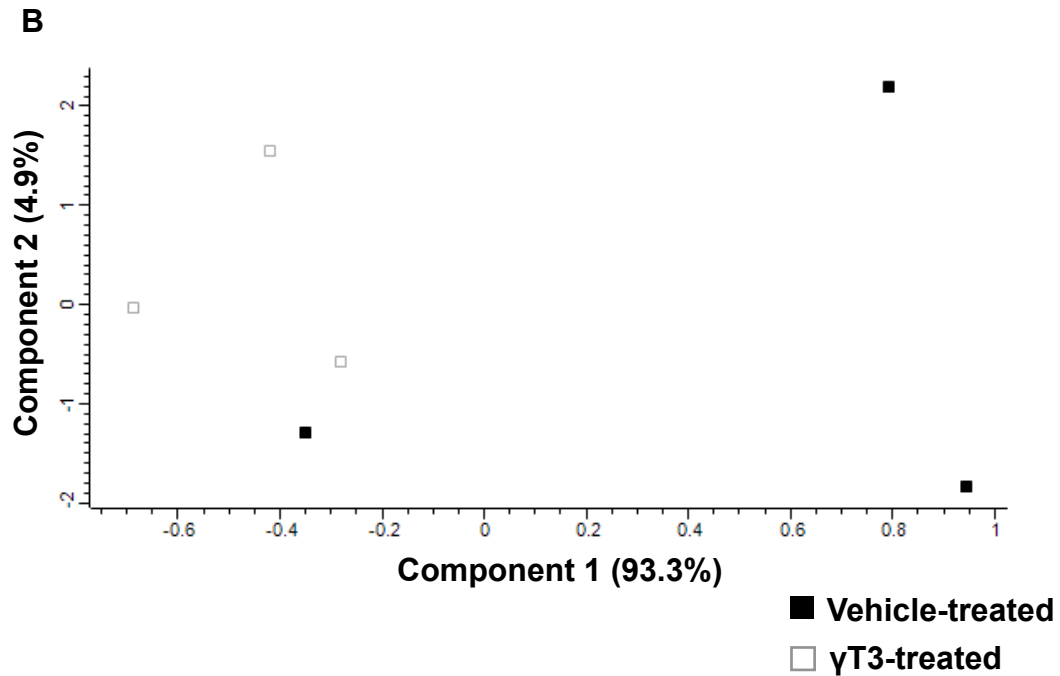

**Figure S1** Principle component analysis of (A) young versus senescent cells and (B) vehicle-versus  $\gamma$ T3-treated senescent cells. N=3 biological replicates for each group.

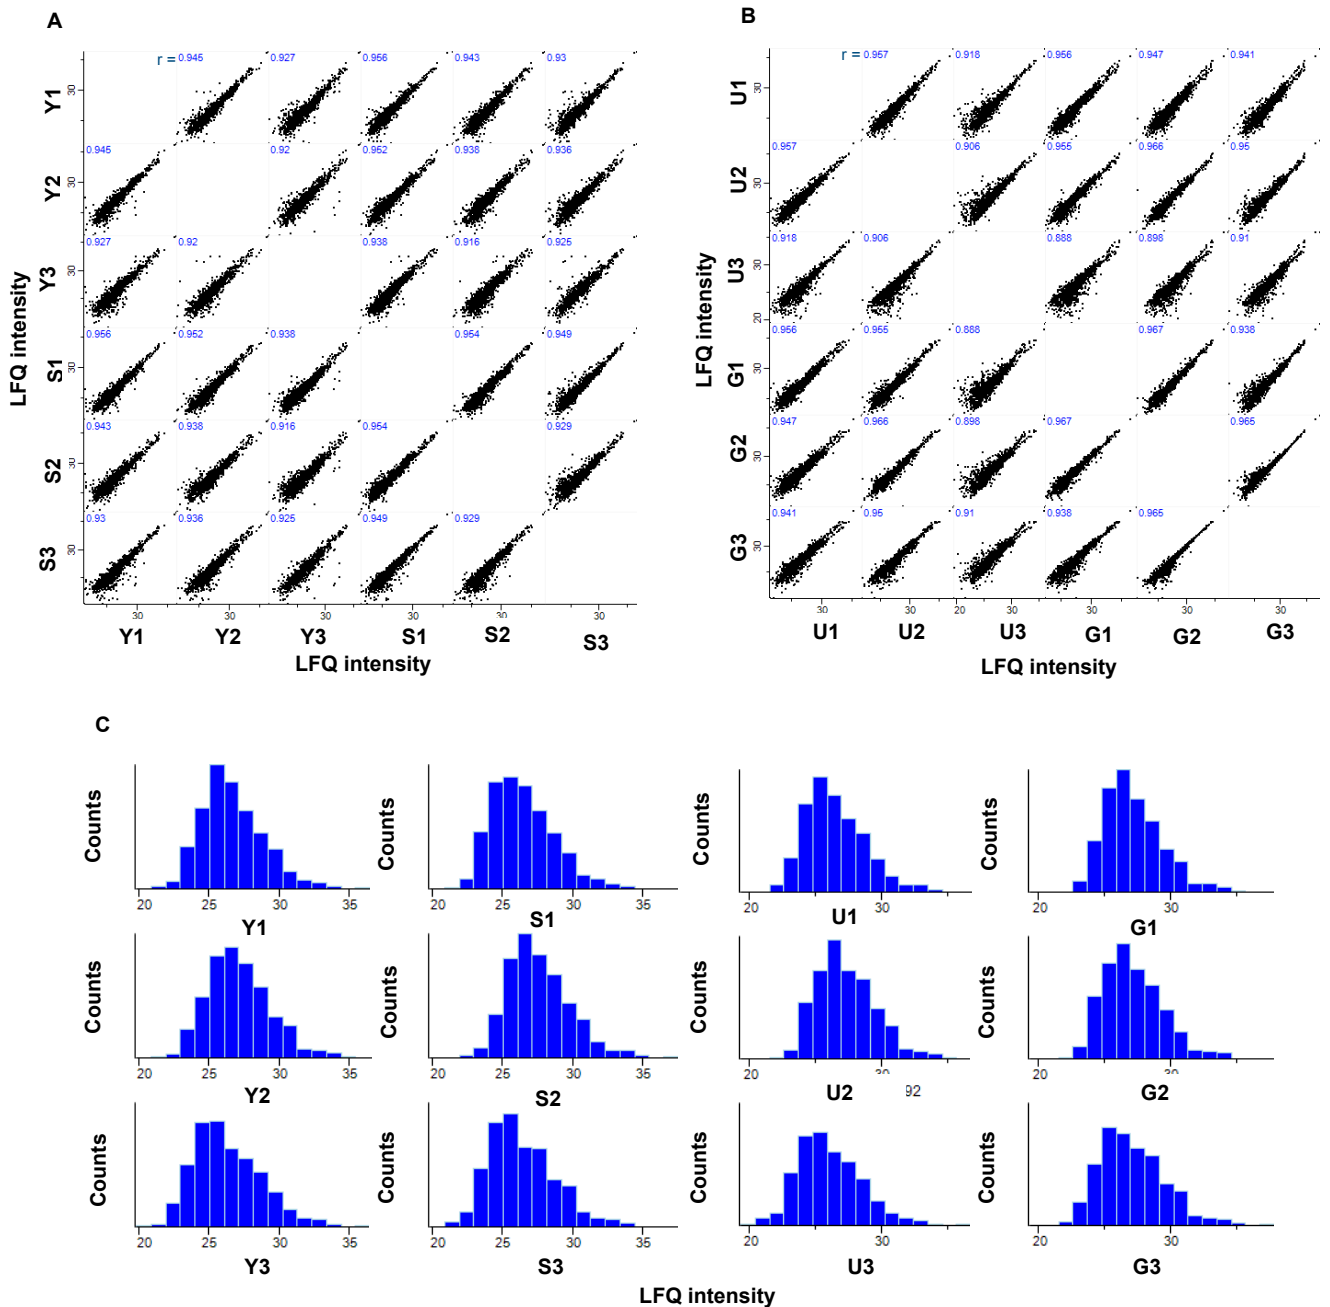

**Figure S2** Quality control analysis of datasets. Multi scatter plot of datasets based on label-free quantitative (LFQ) intensity for (A) young versus senescent cells and (B) vehicle- versus  $\gamma$ T3-treated senescent cells. Pearson correlation ( $r$ ) was shown for each each analysis. Histogram of datasets based of LFQ intensity. Y1-3: young cells; S1-3: senescent cells; U1-3: vehicle-treated senescent cells; G1-3:  $\gamma$ T3-treated senescent cells; each with 3 biological replicates.

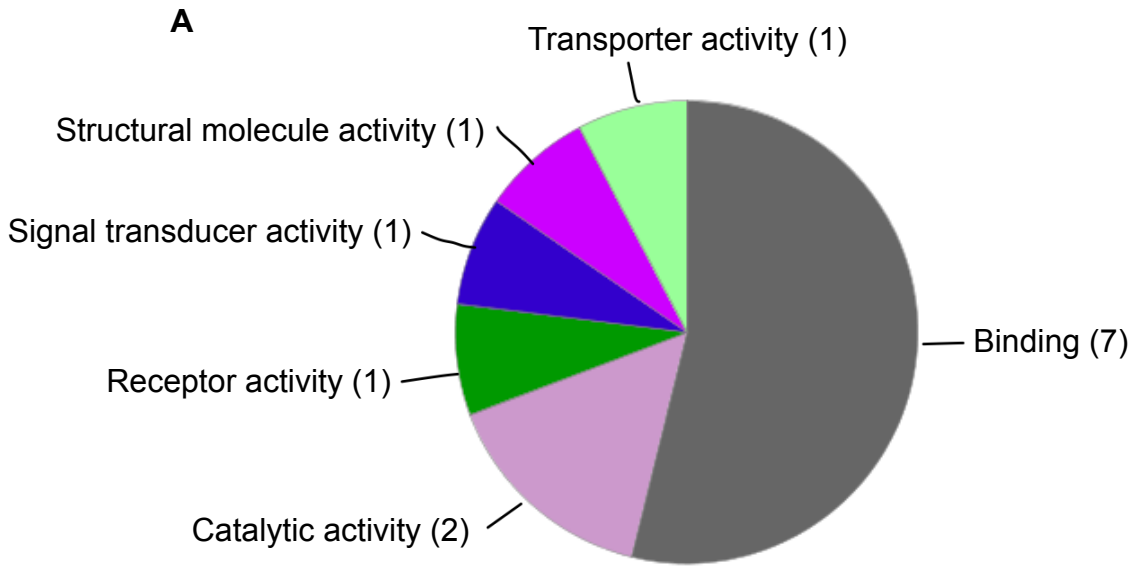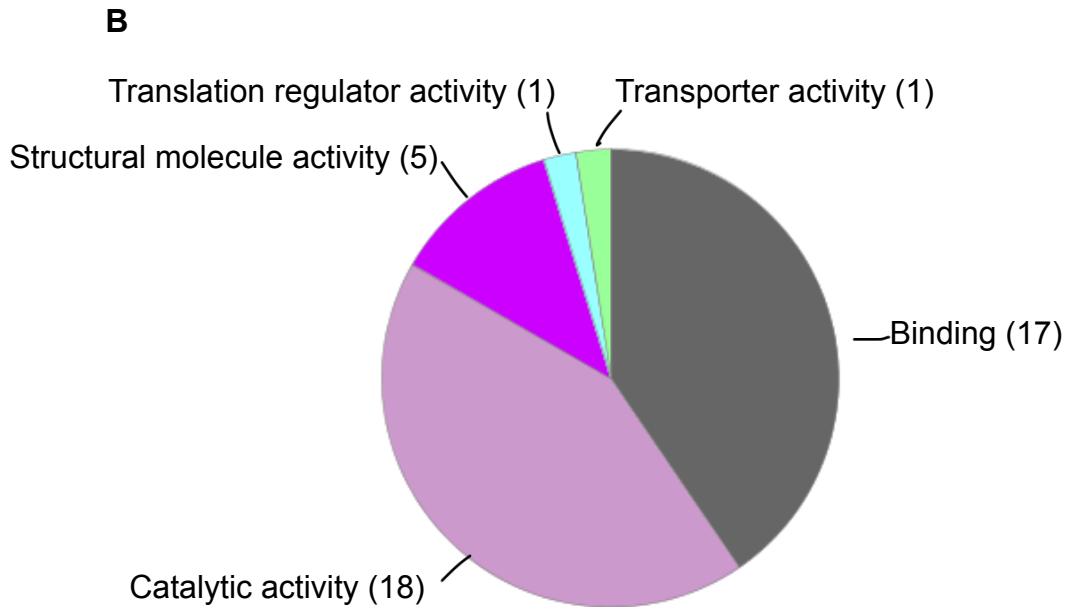

**Figure S3** Molecular functions related to DEPs in (A) young versus senescent cells and (B) vehicle- versus  $\gamma$ T3-treated senescent cells. The number in bracket indicates number of proteins.

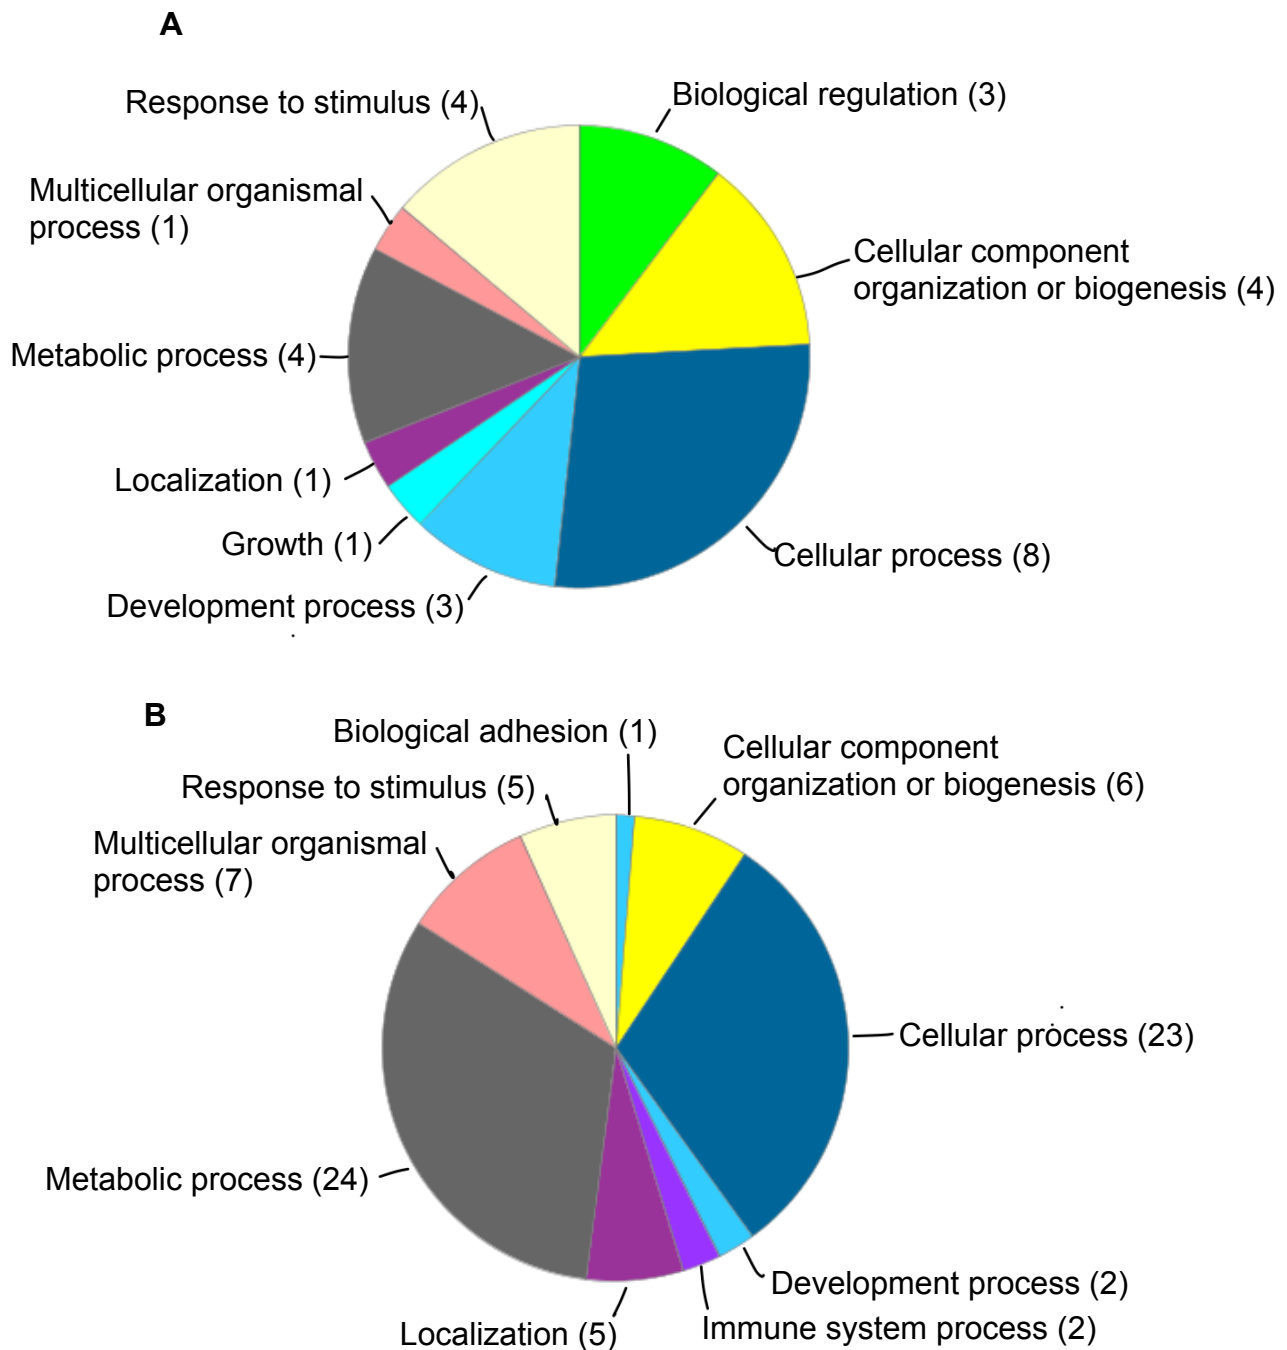

**Figure S4** Biological processes related to DEPs in (A) young versus senescent cells and (B) vehicle- versus  $\gamma$ T3-treated senescent cells. The number in bracket indicates number of proteins.

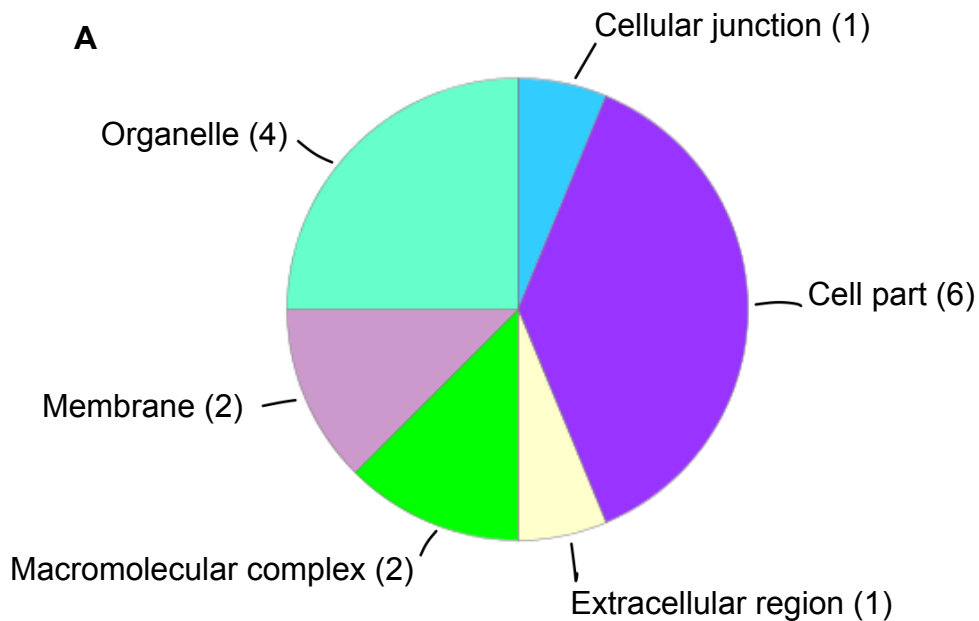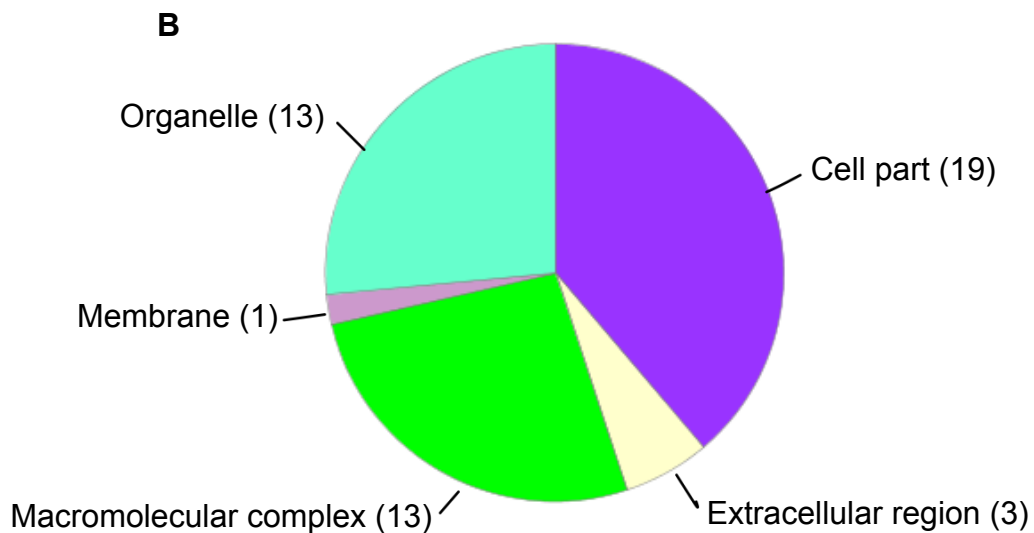

**Figure S5** Cellular components related to DEPs in (A) young versus senescent cells and (B) vehicle- versus  $\gamma$ T3-treated senescent cells. The number in bracket indicates number of proteins.

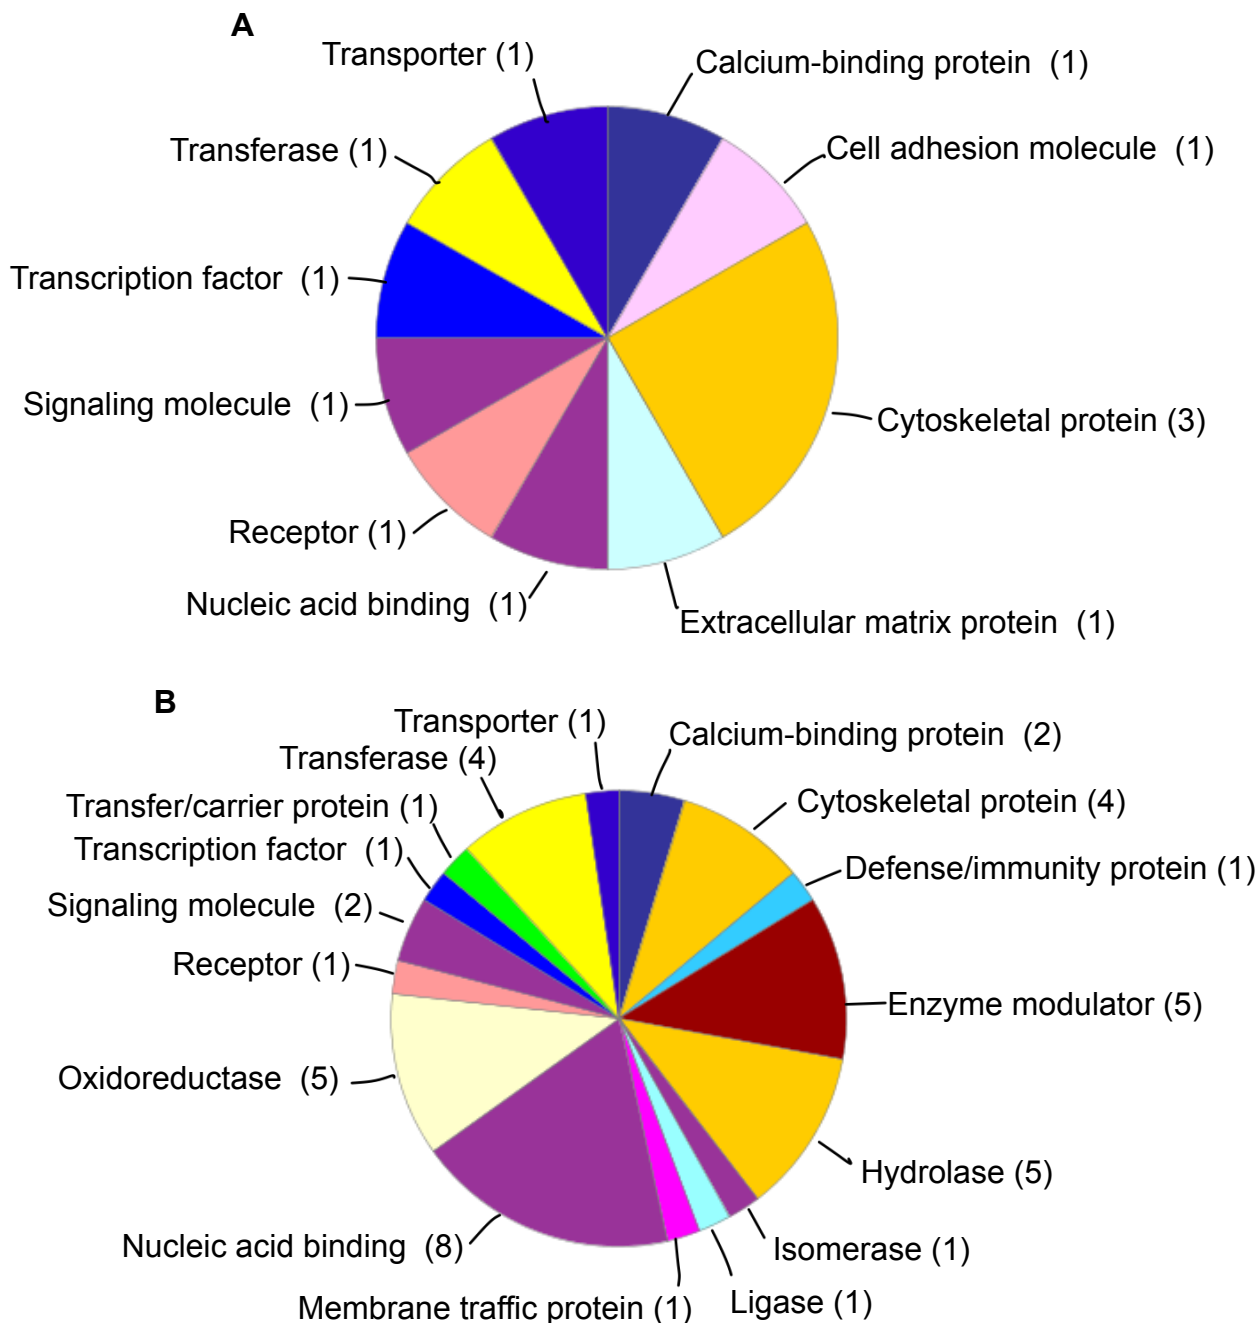

**Figure S6** Protein classes related to DEPs in (A) young versus senescent cells and (B) vehicle- versus  $\gamma$ T3-treated senescent cells. The number in bracket indicates number of proteins.
